# Supplementary material
Source: publisher site journal article supplement (http://study.sagepub.com/sites/default/files/appendix_a_z_table.docx)
Supplement: Supplementary file 1 [file appendix_a_z_table.docx]

  Appendix A (z table).docx         


Dropbox

# Appendix A (z table).docx

Sign in

Download ▾

table-overflow

A

PPENDIX

A

U

NIT

N

ORMAL

T

ABLE

(

Z

T

ABLE

)

z

score

Body

Tail

z

score

Body

Tail

z

score

Body

Tail

z

score

Body

Tail

0.00

0.5000

0.5000

0.44

0.6700

0.3300

0.88

0.8106

0.1894

1.32

0.9066

0.0934

0.01

0.5040

0.4960

0.45

0.6736

0.3264

0.89

0.8133

0.1867

1.33

0.9082

0.0918

0.02

0.5080

0.4920

0.46

0.6772

0.3228

0.90

0.8159

0.1841

1.34

0.9099

0.0901

0.03

0.5120

0.4880

0.47

0.6808

0.3192

0.91

0.8186

0.1814

1.35

0.9115

0.0885

0.04

0.5160

0.4840

0.48

0.6844

0.3156

0.92

0.8212

0.1788

1.36

0.9131

0.0869

0.05

0.5199

0.4801

0.49

0.6879

0.3121

0.93

0.8238

0.1762

1.37

0.9147

0.0853

0.06

0.5239

0.4761

0.50

0.6915

0.3085

0.94

0.8264

0.1736

1.38

0.9162

0.0838

0.07

0.5279

0.4721

0.51

0.6950

0.3050

0.95

0.8289

0.1711

1.39

0.9177

0.0823

0.08

0.5319

0.4681

0.52

0.6985

0.3015

0.96

0.8315

0.1685

1.40

0.9192

0.0808

0.09

0.5359

0.4641

0.53

0.7019

0.2981

0.97

0.8340

0.1660

1.41

0.9207

0.0793

0.10

0.5398

0.4602

0.54

0.7054

0.2946

0.98

0.8365

0.1635

1.42

0.9222

0.0778

0.11

0.5438

0.4562

0.55

0.7088

0.2912

0.99

0.8389

0.1611

1.43

0.9236

0.0764

0.12

0.5478

0.4522

0.56

0.7123

0.2877

1.00

0.8413

0.1587

1.44

0.9251

0.0749

0.13

0.5517

0.4483

0.57

0.7157

0.2843

1.01

0.8438

0.1562

1.45

0.9265

0.0735

0.14

0.5557

0.4443

0.58

0.7190

0.2810

1.02

0.8461

0.1539

1.46

0.9279

0.0721

0.15

0.5596

0.4404

0.59

0.7224

0.2776

1.03

0.8485

0.1515

1.47

0.9292

0.0708

0.16

0.5636

0.4364

0.60

0.7257

0.2743

1.04

0.8508

0.1492

1.48

0.9306

0.0694

0.17

0.5675

0.4325

0.61

0.7291

0.2709

1.05

0.8531

0.1469

1.49

0.9319

0.0681

0.18

0.5714

0.4286

0.62

0.7324

0.2676

1.06

0.8554

0.1446

1.50

0.9332

0.0668

0.19

0.5753

0.4247

0.63

0.7357

0.2643

1.07

0.8577

0.1423

1.51

0.9345

0.0655

0.20

0.5793

0.4207

0.64

0.7389

0.2611

1.08

0.8599

0.1401

1.52

0.9357

0.0643

0.21

0.5832

0.4168

0.65

0.7422

0.2578

1.09

0.8621

0.1379

1.53

0.9370

0.0630

0.22

0.5871

0.4129

0.66

0.7454

0.2546

1.10

0.8643

0.1357

1.54

0.9382

0.0618

0.23

0.5910

0.4090

0.67

0.7486

0.2514

1.11

0.8665

0.1335

1.55

0.9394

0.0606

0.24

0.5948

0.4052

0.68

0.7517

0.2483

1.12

0.8686

0.1314

1.56

0.9406

0.0594

0.25

0.5987

0.4013

0.69

0.7549

0.2451

1.13

0.8708

0.1292

1.57

0.9418

0.0582

0.26

0.6026

0.3974

0.70

0.7580

0.2420

1.14

0.8729

0.1271

1.58

0.9429

0.0571

0.27

0.6064

0.3936

0.71

0.7611

0.2389

1.15

0.8749

0.1251

1.59

0.9441

0.0559

0.28

0.6103

0.3897

0.72

0.7642

0.2358

1.16

0.8770

0.1230

1.60

0.9452

0.0548

0.29

0.6141

0.3859

0.73

0.7673

0.2327

1.17

0.8790

0.1210

1.61

0.9463

0.0537

0.30

0.6179

0.3821

0.74

0.7704

0.2296

1.18

0.8810

0.1190

1.62

0.9474

0.0526

0.31

0.6217

0.3783

0.75

0.7734

0.2266

1.19

0.8830

0.1170

1.63

0.9484

0.0516

0.32

0.6255

0.3745

0.76

0.7764

0.2236

1.20

0.8849

0.1151

1.64

0.9495

0.0505

0.33

0.6293

0.3707

0.77

0.7794

0.2206

1.21

0.8869

0.1131

1.65

0.9505

0.0495

0.34

0.6331

0.3669

0.78

0.7823

0.2177

1.22

0.8888

0.1112

1.66

0.9515

0.0485

0.35

0.6368

0.3632

0.79

0.7852

0.2148

1.23

0.8907

0.1093

1.67

0.9525

0.0475

0.36

0.6406

0.3594

0.80

0.7881

0.2119

1.24

0.8925

0.1075

1.68

0.9535

0.0465

0.37

0.6443

0.3557

0.81

0.7910

0.2090

1.25

0.8944

0.1056

1.69

0.9545

0.0455

0.38

0.6480

0.3520

0.82

0.7939

0.2061

1.26

0.8962

0.1038

1.70

0.9554

0.0446

0.39

0.6517

0.3483

0.83

0.7967

0.2033

1.27

0.8980

0.1020

1.71

0.9564

0.0436

0.40

0.6554

0.3446

0.84

0.7995

0.2005

1.28

0.8997

0.1003

1.72

0.9573

0.0427

0.41

0.6591

0.3409

0.85

0.8023

0.1977

1.29

0.9015

0.0985

1.73

0.9582

0.0418

0.42

0.6628

0.3372

0.86

0.8051

0.1949

1.30

0.9032

0.0968

1.74

0.9591

0.0409

0.43

0.6664

0.3336

0.87

0.8078

0.1922

1.31

0.9049

0.0951

1.75

0.9599

0.0401

z

score

Body

Tail

z

score

Body

Tail

z score

Body

Tail

z score

Body

Tail

1.76

0.9608

0.0392

2.20

0.9861

0.0139

2.64

0.9959

0.0041

3.08

0.9990

0.0010

1.77

0.9616

0.0384

2.21

0.9864

0.0136

2.65

0.9960

0.0040

3.09

0.9990

0.0010

1.78

0.9625

0.0375

2.22

0.9868

0.0132

2.66

0.9961

0.0039

3.10

0.9990

0.0010

1.79

0.9633

0.0367

2.23

0.9871

0.0129

2.67

0.9962

0.0038

3.11

0.9991

0.0009

1.80

0.9641

0.0359

2.24

0.9875

0.0125

2.68

0.9963

0.0037

3.12

0.9991

0.0009

1.81

0.9649

0.0351

2.25

0.9878

0.0122

2.69

0.9964

0.0036

3.13

0.9991

0.0009

1.82

0.9656

0.0344

2.26

0.9881

0.0119

2.70

0.9965

0.0035

3.14

0.9992

0.0008

1.83

0.9664

0.0336

2.27

0.9884

0.0116

2.71

0.9966

0.0034

3.15

0.9992

0.0008

1.84

0.9671

0.0329

2.28

0.9887

0.0113

2.72

0.9967

0.0033

3.16

0.9992

0.0008

1.85

0.9678

0.0322

2.29

0.9890

0.0110

2.73

0.9968

0.0032

3.17

0.9992

0.0008

1.86

0.9686

0.0314

2.30

0.9893

0.0107

2.74

0.9969

0.0031

3.18

0.9993

0.0007

1.87

0.9693

0.0307

2.31

0.9896

0.0104

2.75

0.9970

0.0030

3.19

0.9993

0.0007

1.88

0.9699

0.0301

2.32

0.9898

0.0102

2.76

0.9971

0.0029

3.20

0.9993

0.0007

1.89

0.9706

0.0294

2.33

0.9901

0.0099

2.77

0.9972

0.0028

3.21

0.9993

0.0007

1.90

0.9713

0.0287

2.34

0.9904

0.0096

2.78

0.9973

0.0027

3.22

0.9994

0.0006

1.91

0.9719

0.0281

2.35

0.9906

0.0094

2.79

0.9974

0.0026

3.23

0.9994

0.0006

1.92

0.9726

0.0274

2.36

0.9909

0.0091

2.80

0.9974

0.0026

3.24

0.9994

0.0006

1.93

0.9732

0.0268

2.37

0.9911

0.0089

2.81

0.9975

0.0025

3.25

0.9994

0.0006

1.94

0.9738

0.0262

2.38

0.9913

0.0087

2.82

0.9976

0.0024

3.26

0.9994

0.0006

1.95

0.9744

0.0256

2.39

0.9916

0.0084

2.83

0.9977

0.0023

3.27

0.9995

0.0005

1.96

0.9750

0.0250

2.40

0.9918

0.0082

2.84

0.9977

0.0023

3.28

0.9995

0.0005

1.97

0.9756

0.0244

2.41

0.9920

0.0080

2.85

0.9978

0.0022

3.29

0.9995

0.0005

1.98

0.9761

0.0239

2.42

0.9922

0.0078

2.86

0.9979

0.0021

3.30

0.9995

0.0005

1.99

0.9767

0.0233

2.43

0.9925

0.0075

2.87

0.9979

0.0021

3.31

0.9995

0.0005

2.00

0.9772

0.0228

2.44

0.9927

0.0073

2.88

0.9980

0.0020

3.32

0.9995

0.0005

2.01

0.9778

0.0222

2.45

0.9929

0.0071

2.89

0.9981

0.0019

3.33

0.9996

0.0004

2.02

0.9783

0.0217

2.46

0.9931

0.0069

2.90

0.9981

0.0019

3.34

0.9996

0.0004

2.03

0.9788

0.0212

2.47

0.9932

0.0068

2.91

0.9982

0.0018

3.35

0.9996

0.0004

2.04

0.9793

0.0207

2.48

0.9934

0.0066

2.92

0.9982

0.0018

3.36

0.9996

0.0004

2.05

0.9798

0.0202

2.49

0.9936

0.0064

2.93

0.9983

0.0017

3.37

0.9996

0.0004

2.06

0.9803

0.0197

2.50

0.9938

0.0062

2.94

0.9984

0.0016

3.38

0.9996

0.0004

2.07

0.9808

0.0192

2.51

0.9940

0.0060

2.95

0.9984

0.0016

3.39

0.9997

0.0003

2.08

0.9812

0.0188

2.52

0.9941

0.0059

2.96

0.9985

0.0015

3.40

0.9997

0.0003

2.09

0.9817

0.0183

2.53

0.9943

0.0057

2.97

0.9985

0.0015

3.41

0.9997

0.0003

2.10

0.9821

0.0179

2.54

0.9945

0.0055

2.98

0.9986

0.0014

3.42

0.9997

0.0003

2.11

0.9826

0.0174

2.55

0.9946

0.0054

2.99

0.9986

0.0014

3.43

0.9997

0.0003

2.12

0.9830

0.0170

2.56

0.9948

0.0052

3.00

0.9987

0.0013

3.44

0.9997

0.0003

2.13

0.9834

0.0166

2.57

0.9949

0.0051

3.01

0.9987

0.0013

3.45

0.9997

0.0003

2.14

0.9838

0.0162

2.58

0.9951

0.0049

3.02

0.9987

0.0013

3.46

0.9997

0.0003

2.15

0.9842

0.0158

2.59

0.9952

0.0048

3.03

0.9988

0.0012

3.47

0.9997

0.0003

2.16

0.9846

0.0154

2.60

0.9953

0.0047

3.04

0.9988

0.0012

3.48

0.9997

0.0003

2.17

0.9850

0.0150

2.61

0.9955

0.0045

3.05

0.9989

0.0011

3.49

0.9998

0.0002

2.18

0.9854

0.0146

2.62

0.9956

0.0044

3.06

0.9989

0.0011

3.50

0.9998

0.0002

2.19

0.9857

0.0143

2.63

0.9957

0.0043

3.07

0.9989

0.0011

3.51

0.9998

0.0002

Page 1 of 3

Zoom out

Zoom in

Page up

Page down

Fullscreen

Print

- Comments

?

Write a comment

Post

Post a comment to start a discussion. @Mention someone to notify them.

## 

Sign in with Google

Oops! We couldn’t find a Dropbox account matching that email. Click here to create one.

or

Email

you@mail.com

Password

Minimum 5 characters

Caps lock is currently on

Single sign-on enabled

Remember me

Sign in

Continue

or Log in with Dropbox credentials

Forgot your password?

We sent a code to your phone number ending in \*\*.

Enter the code generated by your authenticator app.

6-digit code

Enter

Trusted computers will never ask you for a security code again. You should only trust this computer if you trust everyone who uses it.

Trust this computer

Resend codeHaving trouble getting a code?

 

Insert your security key to use it

After inserting, tap your key if it has a button or gold disk.

Key not found.

Retry

Trusted computers will never ask you for a security code again. You should only trust this computer if you trust everyone who uses it.

Trust this computer

Send SMS insteadUse mobile authenticator instead

## 

Download and save to your Dropbox by creating a free account, or  sign inDownload and save directly to your Dropbox by signing in, or  create a free account

Sign up with Google

or

First name

Jane

Last name

Doe

Email

you@mail.com

Password

Minimum 5 characters

Good passwords are hard to guess. Use uncommon words or inside jokes, non-standard uPPercasing, creative spelllling, and non-obvious numbers and symbols

Caps lock is currently on

I agree to the Dropbox Terms

Create an account

Sign in with Google

Oops! We couldn’t find a Dropbox account matching that email. Click here to create one.

or

Email

you@mail.com

Password

Minimum 5 characters

Caps lock is currently on

Single sign-on enabled

Remember me

Sign in

Continue

or Log in with Dropbox credentials

Forgot your password?

We sent a code to your phone number ending in \*\*.

Enter the code generated by your authenticator app.

6-digit code

Enter

Trusted computers will never ask you for a security code again. You should only trust this computer if you trust everyone who uses it.

Trust this computer

Resend codeHaving trouble getting a code?

 

Insert your security key to use it

After inserting, tap your key if it has a button or gold disk.

Key not found.

Retry

Trusted computers will never ask you for a security code again. You should only trust this computer if you trust everyone who uses it.

Trust this computer

Send SMS insteadUse mobile authenticator instead

No thanks, continue to view

## 

Download and save to your Dropbox by creating a free account, or  sign inDownload and save directly to your Dropbox by signing in, or  create a free account

Sign up with Google

or

First name

Jane

Last name

Doe

Email

you@mail.com

Password

Minimum 5 characters

Good passwords are hard to guess. Use uncommon words or inside jokes, non-standard uPPercasing, creative spelllling, and non-obvious numbers and symbols

Caps lock is currently on

I agree to the Dropbox Terms

Create an account

Sign in with Google

Oops! We couldn’t find a Dropbox account matching that email. Click here to create one.

or

Email

you@mail.com

Password

Minimum 5 characters

Caps lock is currently on

Single sign-on enabled

Remember me

Sign in

Continue

or Log in with Dropbox credentials

Forgot your password?

We sent a code to your phone number ending in \*\*.

Enter the code generated by your authenticator app.

6-digit code

Enter

Trusted computers will never ask you for a security code again. You should only trust this computer if you trust everyone who uses it.

Trust this computer

Resend codeHaving trouble getting a code?

 

Insert your security key to use it

After inserting, tap your key if it has a button or gold disk.

Key not found.

Retry

Trusted computers will never ask you for a security code again. You should only trust this computer if you trust everyone who uses it.

Trust this computer

Send SMS insteadUse mobile authenticator instead

No thanks, continue to download

## 

One more thing... Choose a password to finish creating your Dropbox account

First name

Jane

Last name

Doe

Email

you@mail.com

Password

Minimum 5 characters

Good passwords are hard to guess. Use uncommon words or inside jokes, non-standard uPPercasing, creative spelllling, and non-obvious numbers and symbols

Caps lock is currently on

I agree to the Dropbox Terms

Create an account

No thanks

## 

Welcome to Dropbox!

Now it's easy to securely back up your files and photos, access them from any device, and share them with others.

Go to my Dropbox

No thanks, stay on this page

## 

To post your comment, create a free Dropbox account.

We'll keep your comment safe during signup.

To subscribe to this file, create a free Dropbox account.

To continue, create a free Dropbox account.

To post your comment, sign in to Dropbox.

We'll keep your comment safe while you sign in.

To subscribe to this file, sign in to Dropbox.

To continue, sign in to Dropbox.

First name

Jane

Last name

Doe

Email

you@mail.com

Password

Minimum 5 characters

Good passwords are hard to guess. Use uncommon words or inside jokes, non-standard uPPercasing, creative spelllling, and non-obvious numbers and symbols

Caps lock is currently on

I agree to the Dropbox Terms

Create an account

Sign in with Google

Oops! We couldn’t find a Dropbox account matching that email. Click here to create one.

or

Email

you@mail.com

Password

Minimum 5 characters

Caps lock is currently on

Single sign-on enabled

Remember me

Sign in

Continue

or Log in with Dropbox credentials

Forgot your password?

We sent a code to your phone number ending in \*\*.

Enter the code generated by your authenticator app.

6-digit code

Enter

Trusted computers will never ask you for a security code again. You should only trust this computer if you trust everyone who uses it.

Trust this computer

Resend codeHaving trouble getting a code?

 

Insert your security key to use it

After inserting, tap your key if it has a button or gold disk.

Key not found.

Retry

Trusted computers will never ask you for a security code again. You should only trust this computer if you trust everyone who uses it.

Trust this computer

Send SMS insteadUse mobile authenticator instead

Have a Dropbox account? Sign in.New to Dropbox? Create a free account!
